# Supplementary material for: Tunable and label-free virus enrichment for ultrasensitive virus detection using carbon nanotube arrays
Source: PubMed Central journal article supplement — Sci Adv. 2016 Oct 7;2(10):e1601026. doi: 10.1126/sciadv.1601026 (PMC5055386; doi:10.1126/sciadv.1601026), 2016-10-07
Supplement: 1601026_SM.pdf [file 1601026_SM.pdf]

## Supplementary Materials for **Tunable and label-free virus enrichment for ultrasensitive virus detection using carbon nanotube arrays**

Yin-Ting Yeh, Yi Tang, Aswathy Sebastian, Archi Dasgupta, Nestor Perea-Lopez, Istvan Albert, Huaguang Lu, Mauricio Terrones, Si-Yang Zheng

Published 7 October 2016, *Sci. Adv.* **2**, e1601026 (2016)  
DOI: 10.1126/sciadv.1601026

### The PDF file includes:

- fig. S1. Fabrication process and the testing setup of the CNT-STEM.
- fig. S2. AACVD for N-MWCNT synthesis.
- fig. S3. Raman spectra of the newly synthesized N-MWCNT structures on silicon substrates and the effect of the synthesis time on the height, diameter, and density of the aligned N-MWCNT structure.
- fig. S4. Characterization of size-based particle capture by CNT-STEM.
- fig. S5. Laser diffraction measurement of the size distribution of the LP AIV H5N2 strain used in this study.
- fig. S6. Standard curve for the rRT-PCR detection of H5N2 AIV ( $n = 4$  each).
- fig. S7. Capture efficiency measurement of CNT-STEM with 25-, 95-, and 325-nm intertubular distances when loading H5N2 AIV of  $10^6$  EID<sub>50</sub>/ml of titer into each device ( $n = 6$ ).
- fig. S8. rRT-PCR curves of H5N2 AIV samples of 10 and  $10^2$  EID<sub>50</sub>/ml of titers without enrichment and those of 0.1 and 1 EID<sub>50</sub>/ml of titers with CNT-STEM enrichment ( $n = 6$ ).
- fig. S9. The compatibility test of N-MWCNT to rRT-PCR.
- fig. S10. Diagram of data processing pipeline for NGS.
- fig. S11. SEM images of CNT-STEM after processing field sample containing AIV.
- fig. S12. rRT-PCR detection of the H11N9 AIV duck swab with and without CNT-STEM enrichment.
- fig. S13. Structural mechanics analysis of N-MWCNT forest.
- fig. S14. Analysis device yield, reliability, and failure modes.

- fig. S15. Fluorescent image of FITC-conjugated IgG pass through CNT-STEM of 25-nm in intertubular distance.
- fig. S16. Calculated distance between the iron particles based on the Delaunay triangle selection algorithm.
- table S1. Measurement of the intertubular distance of N-MWCNT forest and the corresponding critical particle sizes of CNT-STEM.
- table S2. Assembled contigs of the LP H5N2 AIV sample enriched by CNT-STEM.
- table S3. Phylogenetic analysis of the sequenced H5N2 strain (A/chicken/PA/7659/1985) to closely related H5N2 AIV strains isolated from United States/Canada in GenBank.
- table S4. Assembled contigs of the H11N9 AIV field sample enriched by CNT-STEM.
- table S5. Phylogenetic analysis of the emerging H11N9 strain (A/duck/PA/02099/2012) to previously reported and closely related AIV strains.
- table S6. Comparison of contigs of the unknown virus (IBDV/turkey/PA/00924/14) generated by de novo assembly after CNT-STEM enrichment and NGS to the closest IBDV strains in GenBank.
- table S7. Single-nucleotide polymorphism/variant analysis of the “unknown” virus (IBDV/turkey/PA/00924/14) to sequenced IBDV virus strains.
- table S8. Comparison of CNT-STEM to several reported ultrafiltration devices.
- table S9. Yield and reliability analysis of CNT-STEM fabrication, assembly, and testing.
- note S1. Structure stiffness of N-MWCNT forest in the CNT-STEM.
- note S2. Device reliability study.
- References (76–85)

**Other Supplementary Material for this manuscript includes the following:**  
(available at [advances.sciencemag.org/cgi/content/full/2/10/e1601026/DC1](http://advances.sciencemag.org/cgi/content/full/2/10/e1601026/DC1))

- Data file S1 (Microsoft Excel format)

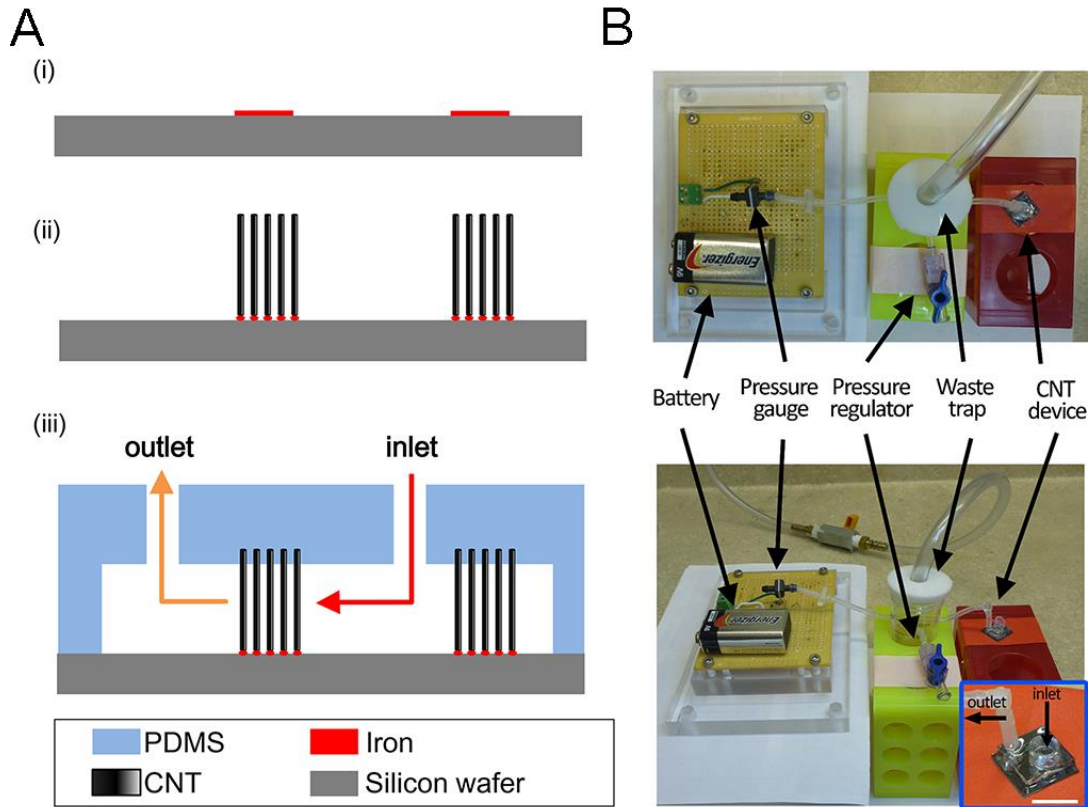

**fig. S1. Fabrication process and the testing setup of the CNT-STEM.** (A) Fabrication process of CNT-STEM. (i) Iron catalyst thin film was deposited on a prime silicon wafer and patterned by a lift-off process. (ii) The aligned CNT was selectively synthesized on patterned silicon surface during AACVD. (iii) CNT-STEM was formed by bonding a PDMS chamber with fluidic access to silicon substrate. Arrows label sample flow direction from the inlet to the outlet. (B) Top and side view of the testing setup. The virus-containing sample was first filtered through a membrane filter of 0.2  $\mu\text{m}$  pore size (not shown here), then loaded into the sample reservoir at the inlet and processed through CNT-STEM via a vacuum source connected through a waste trap at the outlet. The vacuum pressure was measured by a miniature pressure sensor and regulated by a precision mechanical regulator. Inset shows the CNT-STEM device, scale bar: 1 cm.

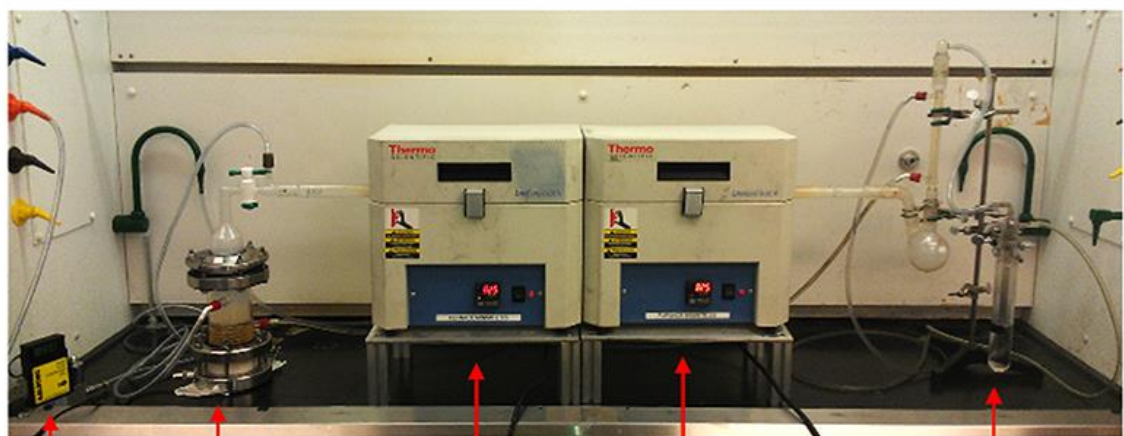

Flow controller

Nebulizer

1<sup>st</sup> furnace

2<sup>nd</sup> furnace

Waste trap

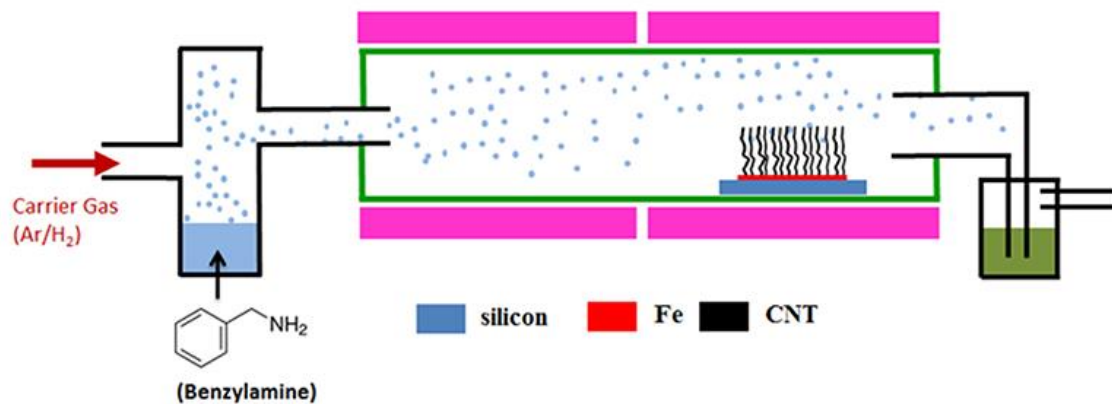

fig. S2. AACVD for N-MWCNT synthesis.

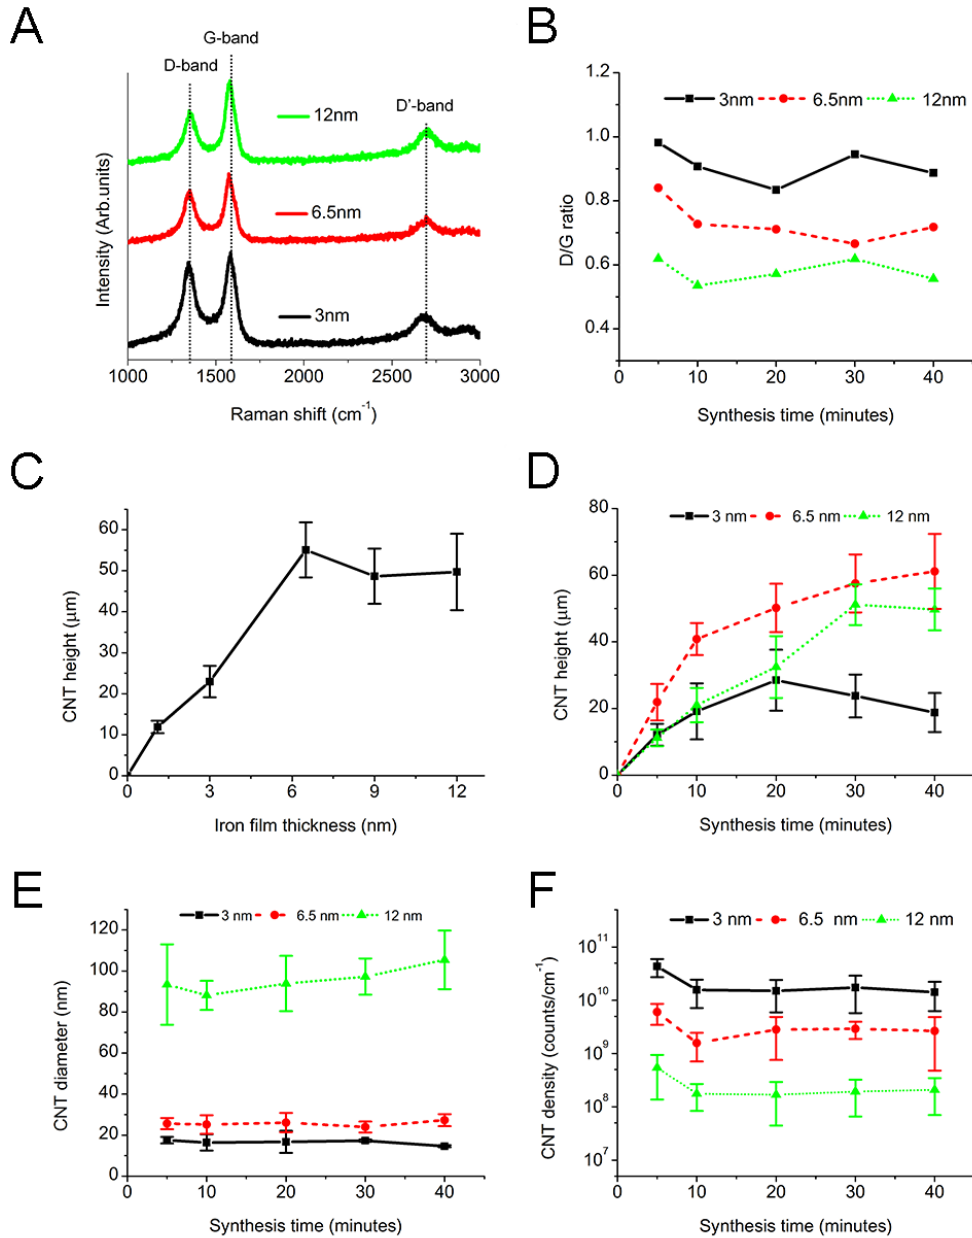

**fig. S3. Raman spectra of the newly synthesized N-MWCNT structures on silicon substrates and the effect of the synthesis time on the height, diameter, and density of the aligned N-MWCNT structure.** Geometrical parameters were measured from SEM images. **(A)** Raman spectra of the N-MWCNT structures synthesized on 3 nm, 6.5 nm and 12 nm thick iron catalyst thin films. The Raman spectra indicate the aligned N-MWCNT has D, G and D' band peaks at 1352, 1578 and 2659  $\text{cm}^{-1}$ , respectively. The results are consistent with previous studies on N-MWCNT. **(B)** Plot of the peak height ratio of the D band and G band of the N-MWCNT structures formed on 3 nm, 6.5 nm and 12 nm thick iron catalyst thin films over synthesis time. Thicker iron catalyst layer results in lower D/G band ratio. **(C)** Height of N-MWCNT structure synthesized for 30 minutes on 1 nm, 3 nm, 6.5 nm, 9 nm and 12 nm thick iron thin films ( $n = 8$ ). **(b-d)** The effect of the synthesis time on the height **(D)**, diameter **(E)** and linear density **(F)** of the N-MWCNT structure. The N-MWCNT was grown on 3 nm, 6.5 nm and 12 nm thick iron catalyst thin films under 5, 10, 20, 30 and 40 minutes of AACVD synthesis ( $n = 8$ ).

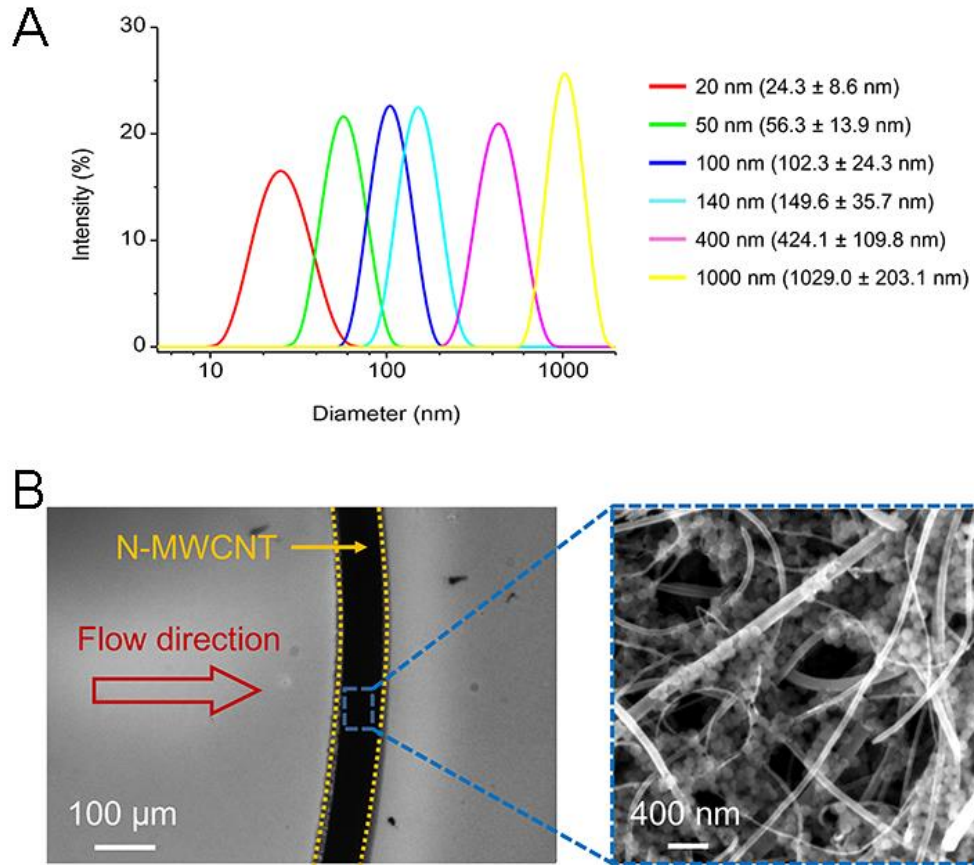

**fig. S4. Characterization of size-based particle capture by CNT-STEM.** (A) Diameter distribution of fluorescent polystyrene nanospheres measured by laser diffraction. (B) Fluorescence microscopic image showing the transport of 100 nm fluorescently labeled nanospheres in CNT-STEM device with 95 nm inter-tubular distance. Inset is a SEM image of nanospheres trapped inside N-MWCNT structure of the CNT-STEM.

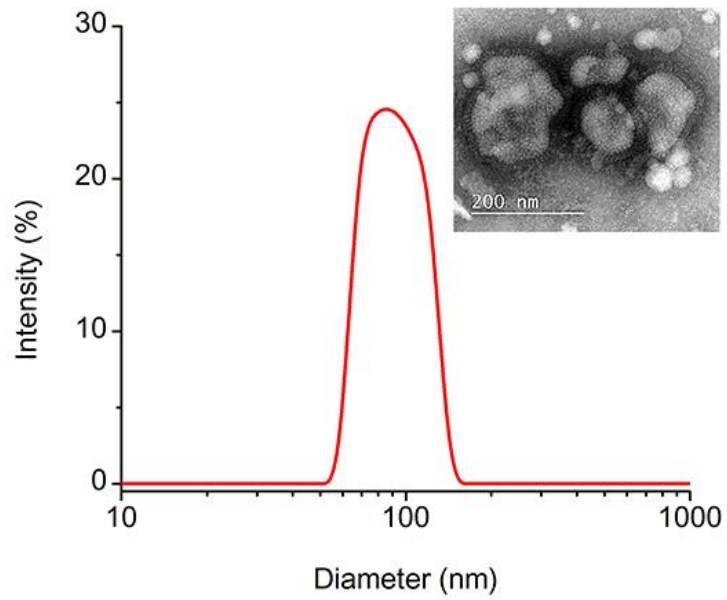

**fig. S5. Laser diffraction measurement of the size distribution of the LP AIV H5N2 strain used in this study.** Inset showed TEM image of the H5N2 virus. Scale bar, 200 nm.

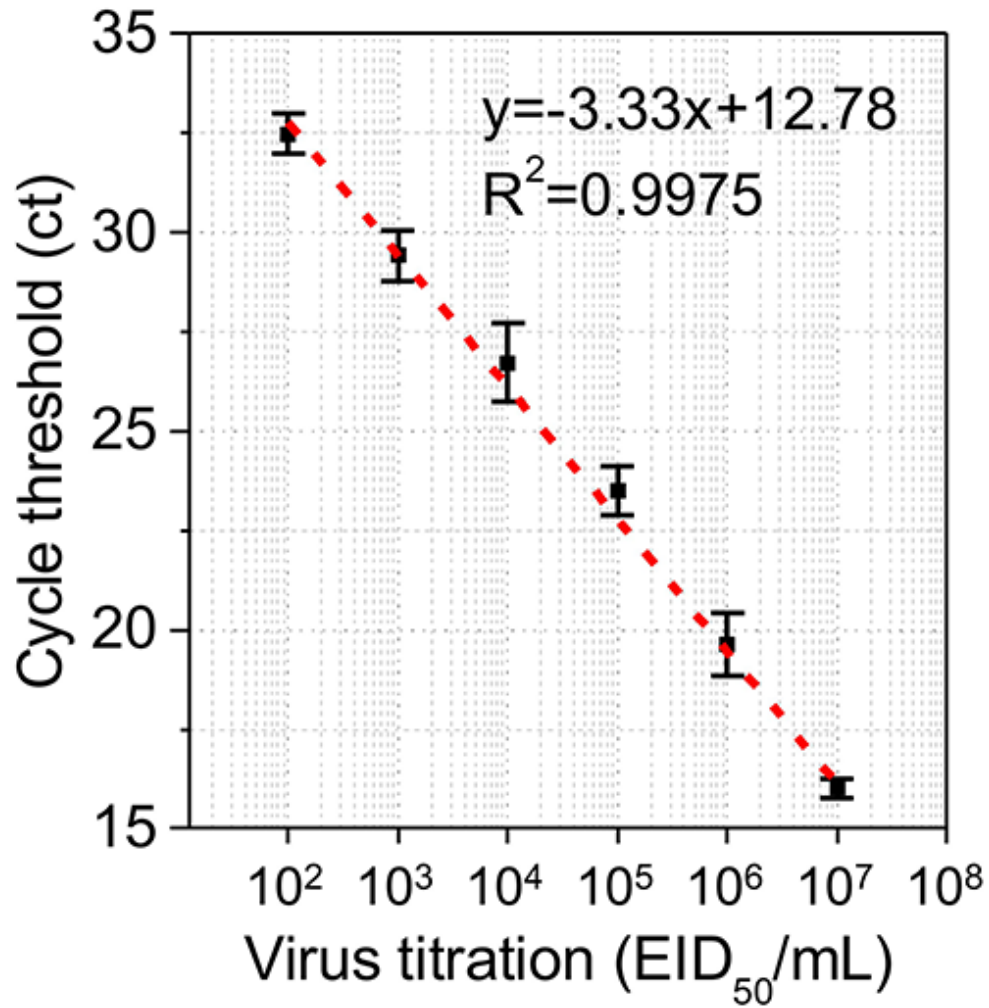

**fig. S6. Standard curve for the rRT-PCR detection of H5N2 AIV ( $n = 4$  each).** The rRT-PCR assay had efficiency of 99.66% with the slope of the standard curve -3.33. The concentration of the original H5N2 sample (no dilution) was  $\sim 1.8 \times 10^8$  EID<sub>50</sub>. No signal was detected after 10<sup>7</sup> dilution thus the detection limit here was  $1.8 \times 10^2$  EID<sub>50</sub>/mL.



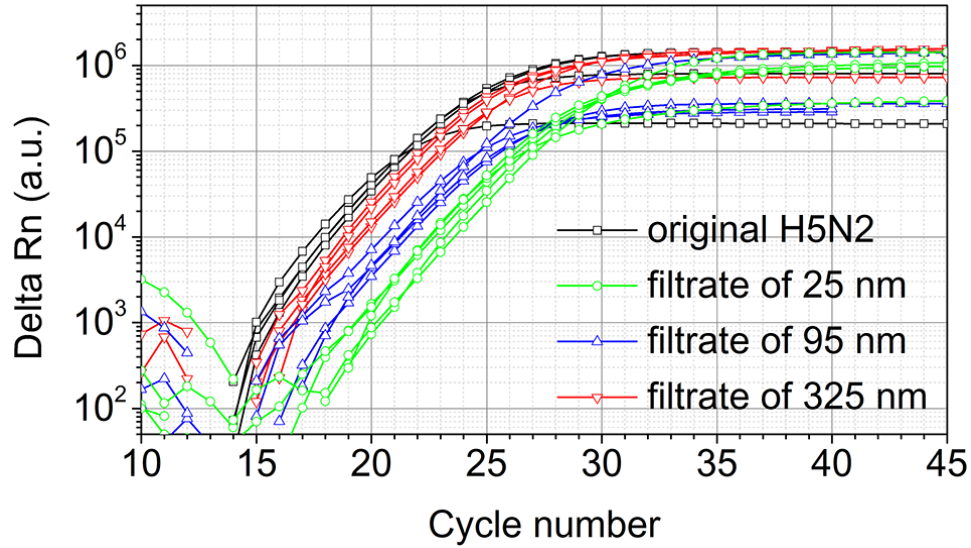

fig. S7. Capture efficiency measurement of CNT-STEM with 25-, 95-, and 325-nm intertubular distances when loading H5N2 AIV of  $10^6$  EID<sub>50</sub>/ml titer into each device ( $n = 6$ ). The Ct values of filtrates and the original sample were measured ( $n = 6$  each).

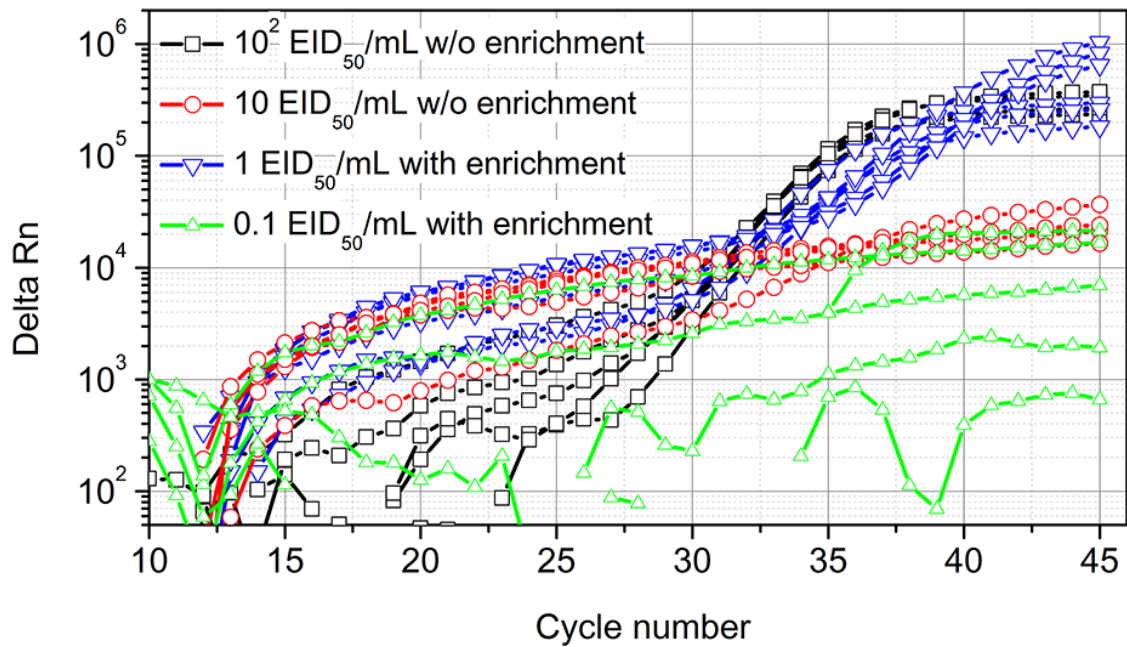

fig. S8. rRT-PCR curves of H5N2 AIV samples of 10 and  $10^2$  EID<sub>50</sub>/ml titers without enrichment and those of 0.1 and 1 EID<sub>50</sub>/ml titers with CNT-STEM enrichment ( $n = 6$ ).

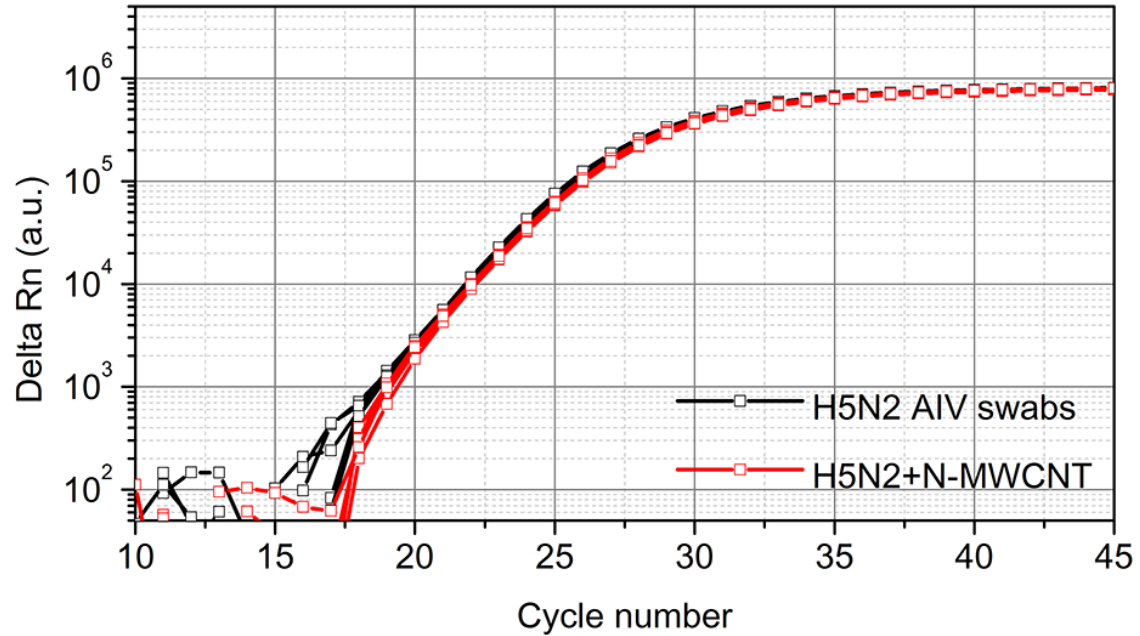

**fig. S9. The compatibility test of N-MWCNT to rRT-PCR.** The “H5N2 + N-MWCNT” samples were prepared by scraping N-MWCNT from the CNT-STEM without virus processing using razor blade and then mixed with swab-mimicking H5N2 AIV samples of  $5 \times 10^4$  EID<sub>50</sub>/ml titer for rRT-PCR detection ( $n = 5$ ).

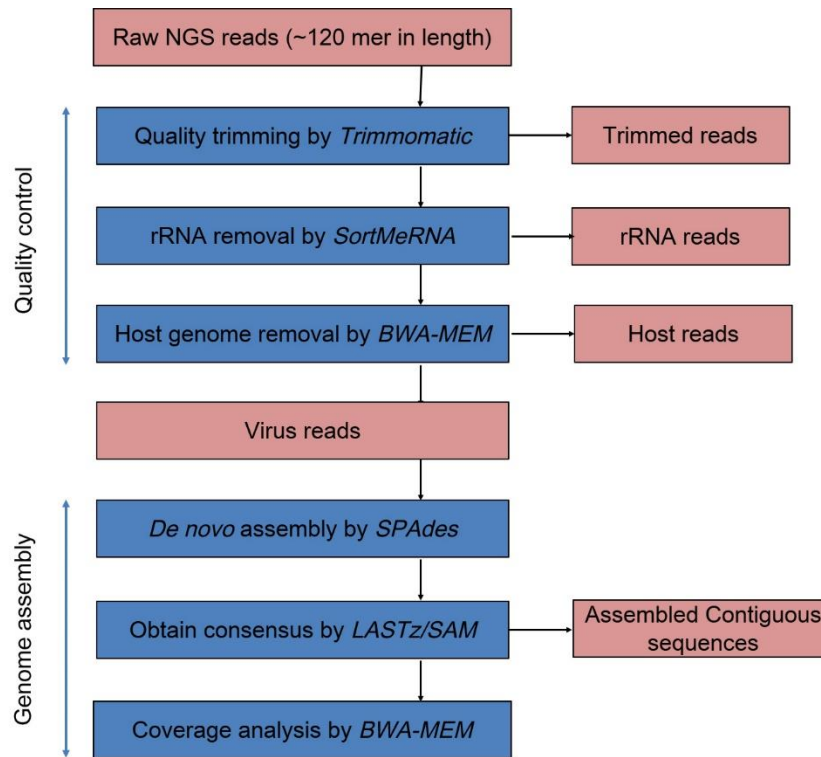

**fig. S10. Diagram of data processing pipeline for NGS.**

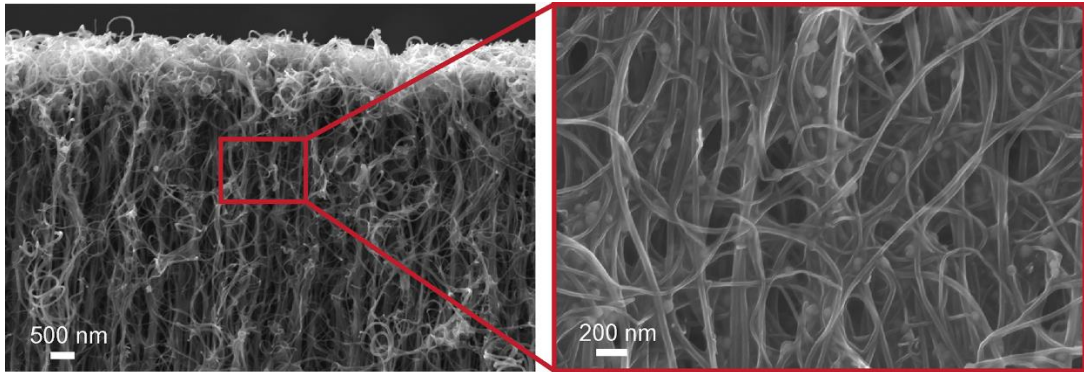

fig. S11. SEM images of CNT-STEM after processing field sample containing AIV.

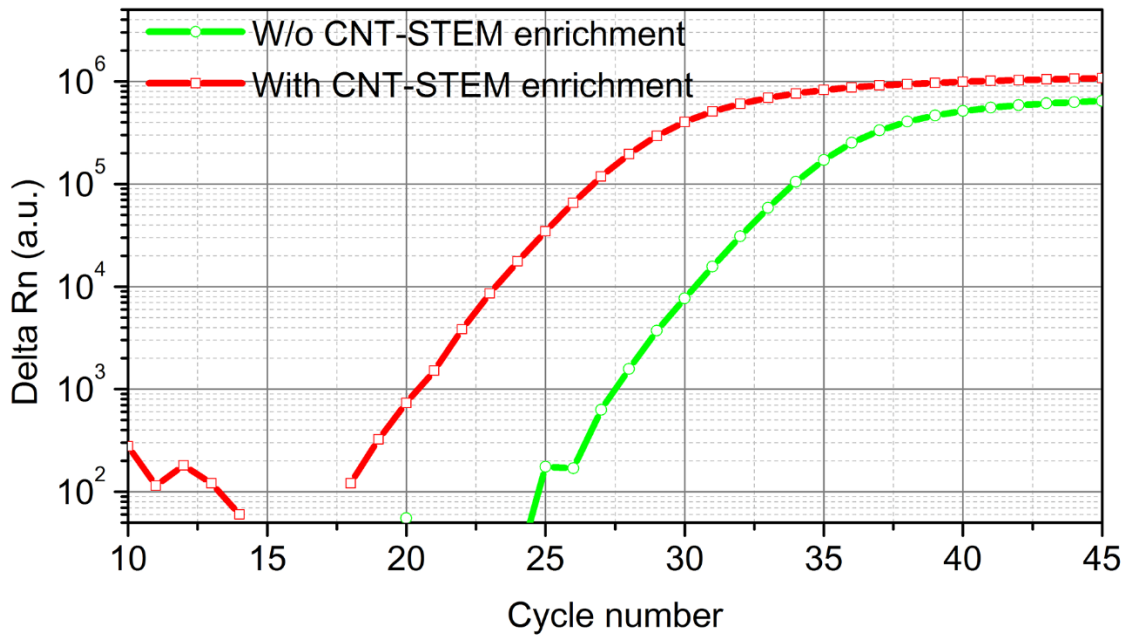

fig. S12. rRT-PCR detection of the H11N9 AIV duck swab with and without CNT-STEM enrichment.

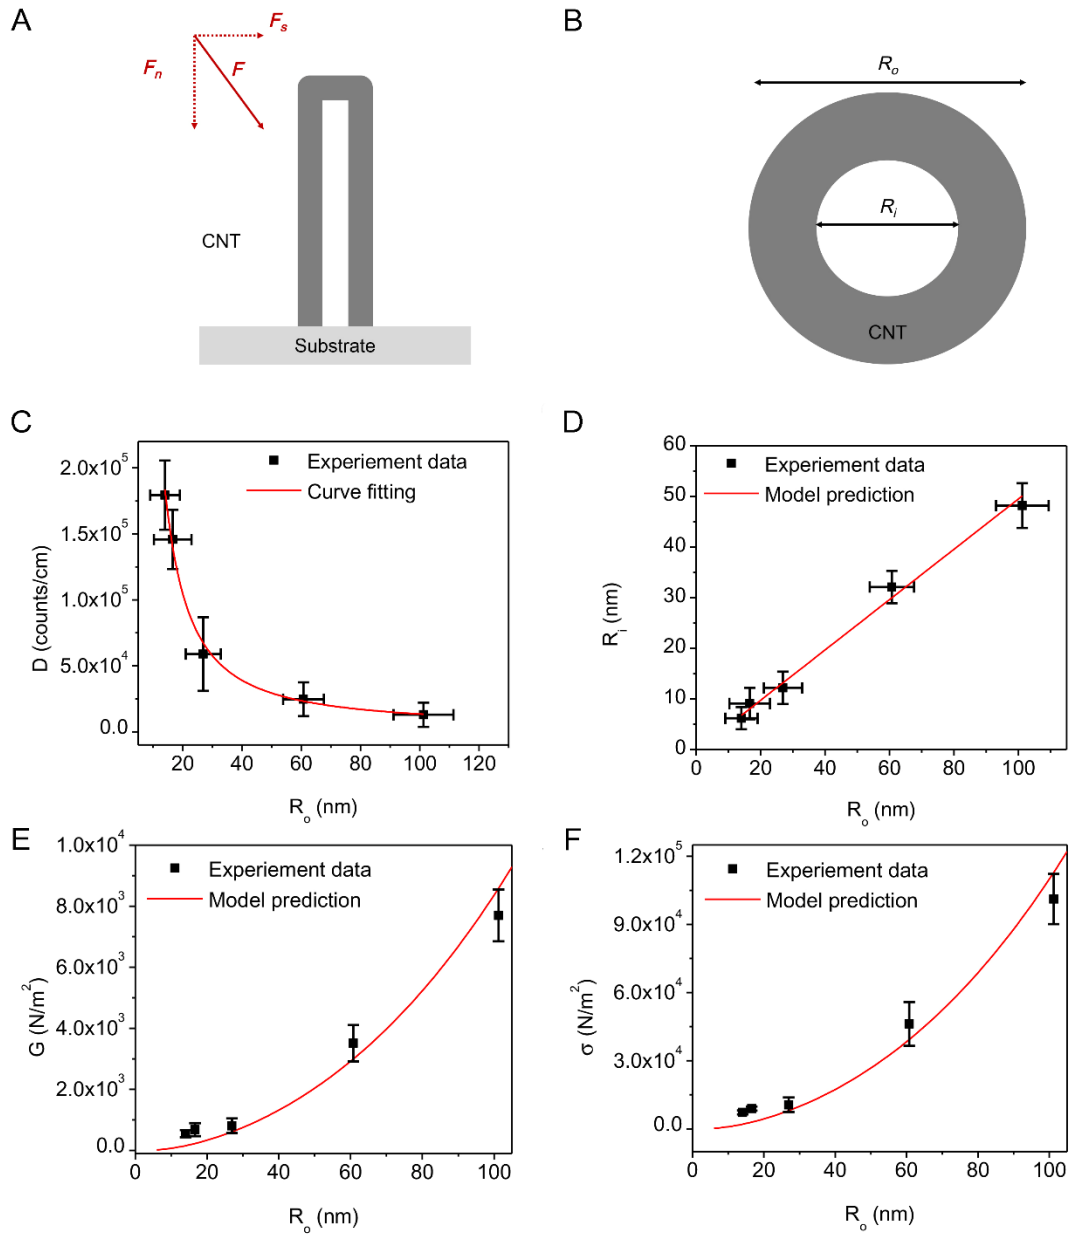

**fig. S13. Structural mechanics analysis of N-MWCNT forest.** (A) Illustration of a force ( $F$ ) applied to hallow cylindrical N-MWCNT structure.  $F$  can be resolved into the shear force  $F_s$  and normal force  $F_n$ . (B) Geometry illustration of the outer diameter ( $R_o$ ) and the inner diameter ( $R_i$ ) of a N-MWCNT hallow cylindrical structure. (C) Plot of the measured linear density ( $D$ ) versus outer diameter and the fitting curve. (D) Plot of measured inner diameter versus outer diameter and the fitted curve. (E) Plot of shear modulus ( $G$ ) of the N-MWCNT forest versus fitted N-MWCNT outer diameter under a shear force loading. Calculated  $G$  based on measured N-MWCNT diameter is labeled as “Experimental data”. (F) Plot of the critical buckling stress ( $\sigma$ ) versus N-MWCNT outer diameter under a normal force loading.

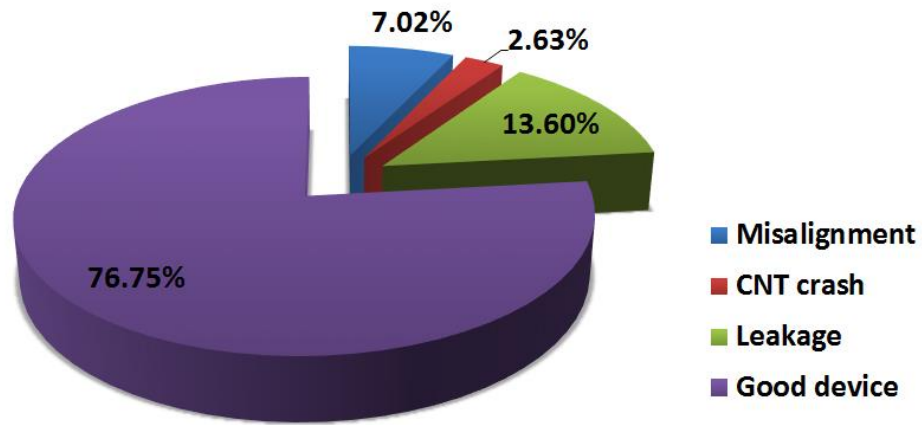

**fig. S14. Analysis device yield, reliability, and failure modes.** Good devices are CNT-STEMs that are successfully fabricated, assembled and tested. Failed devices can be cataloged as misalignment during device fabrication (Misalignment), mishandling resulted in N-MWCNT structure crash (CNT crash) and leakage during quality check of flow filtration (Leakage).

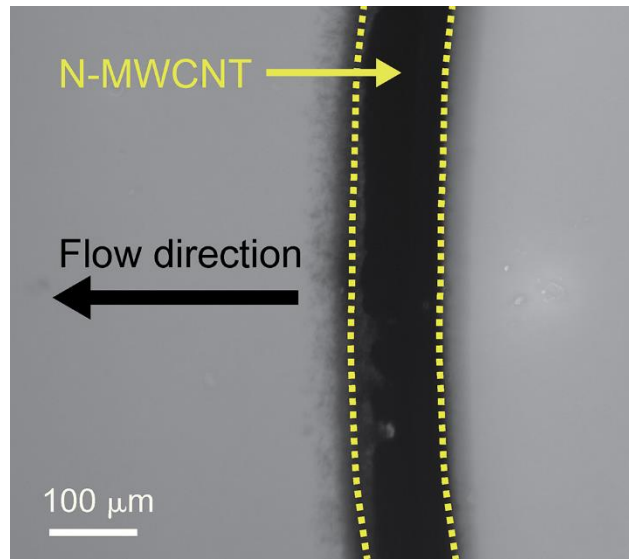

fig. S15. Fluorescent image of FITC-conjugated IgG pass through CNT-STEM of 25-nm in intertubular distance.

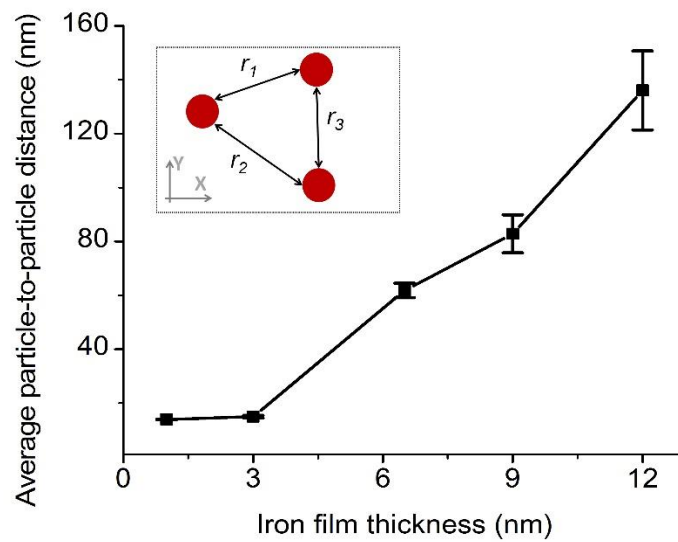

fig. S16 Calculated distance between the iron particles based on the Delaunay triangle selection algorithm. The inset illustrates the geometry definition of nearest neighbor particles. The average particle-to-particle distance is the mean of  $r_1$ ,  $r_2$  and  $r_3$ .

**table S1. Measurement of the intertubular distance of N-MWCNT forest and the corresponding critical particle sizes of CNT-STEM.**

| Iron catalyst thickness (nm) | N-MWCNT                     |                         | Critical particle sizes of CNT-STEM (nm) |
|------------------------------|-----------------------------|-------------------------|------------------------------------------|
|                              | Inter-tubular distance (nm) | Standard deviation (nm) |                                          |
| 1                            | 17                          | 6                       | -                                        |
| 3                            | 25                          | 10                      | ~35                                      |
| 6.5                          | 95                          | 25                      | ~80                                      |
| 9                            | 194                         | 40                      | -                                        |
| 12                           | 325                         | 56                      | ~225                                     |

**table S2. Assembled contigs of the LP H5N2 AIV sample enriched by CNT-STEM.**

| Segment        | Contig length (nt) | Ave. seq. depth<br>(min/max) | Closest H5N2 strain in Genbank                  |                |                     |          |
|----------------|--------------------|------------------------------|-------------------------------------------------|----------------|---------------------|----------|
|                |                    |                              | Highest similarity strain (sequence ID)         | Length<br>(nt) | Identities          | Gaps     |
| <b>PB2</b>     | 2316               | 8446±4870<br>(3427/25340)    | A/turkey/MN/3689-1551/1982(H5N2)<br>(EU743285)  | 2315           | 99%<br>(2315/2316)  | 0/2316   |
| <b>PB1</b>     | 2316               | 10388±3464<br>(3376/22974)   | A/turkey/MN/3689-1551/1982(H5N2)<br>(EU743284)  | 2306           | 99%<br>(2305/2306)  | 0/2306   |
| <b>PA</b>      | 2259               | 12334±2268<br>(1935/18966)   | A/mallard/New York/189/1982(H5N2)<br>(CY014854) | 2225           | 99%<br>(2204/2225)  | 0/2225   |
| <b>HA</b>      | 1742               | 12221±2751<br>(1820/18275)   | A/mallard/WI/411/1981(H5N2)<br>(CY179411)       | 1742           | 99%<br>(1732/1742)  | 0/1742   |
| <b>NP</b>      | 1633               | 13921±3190<br>(1453/21459)   | A/turkey/MN/3689-1551/1982(H5N2)<br>(EU743282)  | 1539           | 100%<br>(1539/1539) | 0/1539   |
| <b>NA</b>      | 1452               | 12819±2835<br>(729/18292)    | A/G-W teal/WI/432/1981(H5N2)<br>(CY179405)      | 1442           | 99%<br>(1437/1439)  | 0/1439   |
| <b>M1/M2</b>   | 1047               | 15646±3986<br>(2241/28076)   | A/turkey/MN/1598/1981(H5N2)<br>(CY014761)       | 1015           | 99%<br>(1013/1015)  | 0/1015   |
| <b>NS1/NS2</b> | 905                | 14804±4022<br>(1138/22400)   | A/turkey/MN/3689-1551/1981(H5N2)<br>(U85382)    | 865            | 100%<br>(865/865)   | 0/865    |
| <b>Total</b>   | <b>13670</b>       |                              |                                                 | <b>13450</b>   |                     | <b>0</b> |



**table S3. Phylogenetic analysis of the sequenced H5N2 strain (A/chicken/PA/7659/1985) to closely related H5N2 AIV strains isolated from United States/Canada in Genbank.**

**A) HA**

| Strain | % Nucleotide identity |      |      |      |      |      |      |      |      |      |      |      |      |      |      |      |      |      |
|--------|-----------------------|------|------|------|------|------|------|------|------|------|------|------|------|------|------|------|------|------|
|        | 1                     | 2    | 3    | 4    | 5    | 6    | 7    | 8    | 9    | 10   | 11   | 12   | 13   | 14   | 15   | 16   | 17   | 18   |
| 1      | ***                   | 99.5 | 97.6 | 97.3 | 96.9 | 94.5 | 94.4 | 94.4 | 94.4 | 94.3 | 94.3 | 94.2 | 94.2 | 94.2 | 94.2 | 94.2 | 94.1 | 93.9 |
| 2      | 99.3                  | ***  | 97.8 | 97.7 | 97   | 94.5 | 94.4 | 94.5 | 94.3 | 94.4 | 94.4 | 94.4 | 94.2 | 94.3 | 94.2 | 94.3 | 94.3 | 94.1 |
| 3      | 98.3                  | 98.7 | ***  | 99.2 | 99.2 | 94.9 | 94.4 | 94.9 | 94.7 | 94.3 | 94.7 | 94.7 | 94.6 | 94.6 | 94.5 | 94.6 | 94.5 | 94.4 |
| 4      | 97.9                  | 98.5 | 99.6 | ***  | 98.5 | 94.7 | 94.3 | 94.7 | 94.5 | 94.3 | 94.5 | 94.5 | 94.3 | 94.4 | 94.3 | 94.4 | 94.3 | 94.2 |
| 5      | 97.7                  | 98.1 | 99.5 | 99.1 | ***  | 94.6 | 94   | 94.6 | 94.4 | 93.9 | 94.4 | 94.4 | 94.5 | 94.3 | 94.2 | 94.3 | 94.2 | 94.1 |
| 6      | 98.1                  | 98.3 | 98.8 | 98.4 | 98.3 | ***  | 95.3 | 99.9 | 99.7 | 95.4 | 99.2 | 99.2 | 98.5 | 99.1 | 95.3 | 99.1 | 98.7 | 98.8 |
| 7      | 96.1                  | 96.3 | 96.5 | 96.1 | 96   | 96.9 | ***  | 95.2 | 95   | 99.5 | 95.2 | 95.2 | 95.1 | 95.1 | 99.5 | 95.1 | 95   | 94.9 |
| 8      | 97.9                  | 98.3 | 98.8 | 98.4 | 98.3 | 99.7 | 96.7 | ***  | 99.7 | 95.4 | 99.2 | 99.2 | 98.5 | 99.1 | 95.2 | 99.1 | 98.7 | 98.8 |
| 9      | 97.9                  | 97.7 | 98.3 | 97.9 | 97.7 | 99.2 | 96.1 | 99.2 | ***  | 95.2 | 99   | 99   | 98.3 | 98.9 | 95   | 98.9 | 98.5 | 98.6 |
| 10     | 96.3                  | 96.4 | 96.7 | 96.3 | 96.1 | 97.1 | 99.3 | 96.8 | 96.3 | ***  | 95.4 | 95.4 | 95.3 | 95.3 | 99.3 | 95.2 | 95.1 | 95   |
| 11     | 97.7                  | 98.1 | 98.4 | 98   | 97.9 | 99.3 | 96.5 | 99.3 | 98.8 | 96.7 | ***  | 99.4 | 98.5 | 99.4 | 95.2 | 99.7 | 98.7 | 98.8 |
| 12     | 97.5                  | 97.9 | 98.1 | 97.7 | 97.6 | 99.1 | 96.5 | 99.1 | 98.5 | 96.7 | 98.9 | ***  | 98.4 | 99.3 | 95.2 | 99.3 | 98.6 | 98.7 |
| 13     | 98                    | 98.1 | 98.4 | 98   | 97.9 | 99.3 | 96.5 | 99.1 | 98.5 | 96.7 | 98.9 | 98.7 | ***  | 98.4 | 95.1 | 98.3 | 98.3 | 98.3 |
| 14     | 97.6                  | 98   | 98.3 | 97.9 | 97.7 | 99.2 | 96.4 | 99.2 | 98.7 | 96.5 | 99.1 | 98.8 | 98.8 | ***  | 95.1 | 99.2 | 98.6 | 98.7 |
| 15     | 96.1                  | 96.3 | 96.5 | 96.1 | 96   | 96.9 | 99.7 | 96.7 | 96.1 | 99.3 | 96.5 | 96.5 | 96.5 | 96.4 | ***  | 95   | 94.9 | 94.8 |
| 16     | 97.6                  | 98   | 98.3 | 97.9 | 97.7 | 99.2 | 96.4 | 99.2 | 98.7 | 96.5 | 99.3 | 98.8 | 98.8 | 98.9 | 96.4 | ***  | 98.5 | 98.6 |
| 17     | 97.9                  | 98.5 | 98.3 | 98.1 | 97.7 | 98.9 | 96.1 | 98.9 | 98.4 | 96.3 | 98.8 | 98.5 | 98.8 | 98.7 | 96.1 | 98.7 | ***  | 99.2 |
| 18     | 97.7                  | 98.1 | 98.4 | 98   | 97.9 | 99.1 | 96.3 | 99.1 | 98.5 | 96.4 | 98.9 | 98.7 | 98.9 | 98.8 | 96.3 | 98.8 | 99.1 | ***  |

% Amino acid identity

| Label | Strain (accession number)                  | Label | Strain (accession number)                |
|-------|--------------------------------------------|-------|------------------------------------------|
| 1     | A/chicken/PA/7659/1985(H5N2)(KP674444)     | 11    | A/fowl/OR/459674-5/2006(H5N2)(GQ923133)  |
| 2     | A/mallard/WI/411/1981(H5N2)(CY179403)      | 12    | A/pintail/BC/07813/2005(H5N2)(CY095268)  |
| 3     | A/mallard/AL/847/1975(H5N2)(CY179763)      | 13    | A/mallard/MN/346250/2000(H5N2)(CY139689) |
| 4     | A/duck/AL/57/1976(H5N2)(CY005918)          | 14    | A/mallard/BC/373/2005(H5N2)(DQ826532)    |
| 5     | A/goose/WI/711/1975(H5N2)(EF607857)        | 15    | A/rhea/TX/39923/1993(H5N2)(EU743106)     |
| 6     | A/goose/AK//445210/2006(H5N2)(GU050182)    | 16    | A/duck/OR/459674-3/2006(H5N2)(GU049986)  |
| 7     | A/chicken/NJ/17169/1993(H5N2)(EU743019)    | 17    | A/bird/WI/439436/2006(H5N2)(GU050174)    |
| 8     | A/goose/AK/477003/2007(H5N2)(GQ923397)     | 18    | A/teal/CA/HKWF609/2007(H5N2)(CY033444)   |
| 9     | A/waterfowl/CO/443593/2006(H5N2)(GQ923517) |       |                                          |
| 10    | A/chicken/PA/3609/1993(H5N2)(CY034681)     |       |                                          |

**B) NA**

|                       | Strain | % Nucleotide identity |      |      |      |      |      |      |      |      |      |      |      |      |      |      |      |      |
|-----------------------|--------|-----------------------|------|------|------|------|------|------|------|------|------|------|------|------|------|------|------|------|
|                       |        | 1                     | 2    | 3    | 4    | 5    | 6    | 7    | 8    | 9    | 10   | 11   | 12   | 13   | 14   | 15   | 16   | 17   |
| % Amino acid identity | 1      | ***                   | 99.1 | 99   | 98.9 | 98.9 | 98.5 | 98.4 | 94.9 | 94.9 | 94.8 | 94.7 | 94.7 | 94.7 | 94.7 | 94.6 | 94.4 |      |
|                       | 2      | 99                    | ***  | 99.3 | 99.1 | 99.1 | 97.7 | 97.5 | 94.2 | 94.1 | 94   | 93.9 | 93.8 | 94   | 94   | 93.9 | 94   | 93.7 |
|                       | 3      | 99.2                  | 98.9 | ***  | 99.8 | 99.7 | 97.7 | 97.5 | 94.3 | 94.4 | 94.4 | 94   | 93.9 | 94.2 | 94.1 | 94.3 | 94.1 | 94.1 |
|                       | 4      | 99.2                  | 98.9 | 99.7 | ***  | 99.8 | 97.6 | 97.4 | 94.2 | 94.4 | 94.4 | 93.9 | 93.8 | 94.2 | 94.1 | 94.3 | 94.1 | 94.1 |
|                       | 5      | 98.9                  | 98.6 | 99.4 | 99.7 | ***  | 97.5 | 97.3 | 94.1 | 94.3 | 94.3 | 93.9 | 93.8 | 94.1 | 94.1 | 94.2 | 94   | 94   |
|                       | 6      | 98.9                  | 97.9 | 98.1 | 98.1 | 97.8 | ***  | 99.7 | 94.5 | 94.5 | 94.3 | 94.3 | 94.1 | 94.1 | 94.3 | 94.3 | 94.3 | 94.3 |
|                       | 7      | 99                    | 98.1 | 98.2 | 98.2 | 97.9 | 99.8 | ***  | 94.5 | 94.4 | 94.3 | 94.2 | 94.1 | 94.1 | 94.3 | 94.3 | 94.2 | 94.2 |
|                       | 8      | 97                    | 96.3 | 96.2 | 96.2 | 95.8 | 96.5 | 96.6 | ***  | 98.3 | 97.4 | 99.1 | 95.5 | 97.2 | 97.6 | 97.4 | 97.6 | 97.2 |
|                       | 9      | 96.5                  | 95.8 | 96   | 96   | 95.7 | 96.3 | 96.5 | 97.6 | ***  | 97.7 | 98.2 | 95.8 | 97.4 | 97.9 | 97.7 | 97.8 | 97.5 |
|                       | 10     | 97.4                  | 96.8 | 96.6 | 96.6 | 96.3 | 97.3 | 97.4 | 98.6 | 98.4 | ***  | 97.6 | 95.5 | 99.5 | 98.6 | 99.7 | 98.6 | 99.4 |
|                       | 11     | 96.8                  | 96.2 | 96   | 96   | 95.7 | 96.3 | 96.5 | 98.9 | 97.4 | 98.4 | ***  | 95.4 | 97.3 | 97.8 | 97.4 | 97.8 | 97.1 |
|                       | 12     | 96.8                  | 96.2 | 96   | 96   | 95.7 | 96.6 | 96.8 | 97   | 96.8 | 97.8 | 96.8 | ***  | 95.2 | 95.2 | 95.4 | 95.2 | 95.2 |
|                       | 13     | 97.8                  | 97.1 | 97   | 97   | 96.6 | 97   | 97.1 | 98.6 | 98.1 | 99.7 | 98.4 | 97.4 | ***  | 98.3 | 99.3 | 98.3 | 99   |
|                       | 14     | 97.4                  | 96.8 | 96.6 | 96.6 | 96.3 | 97.3 | 97.4 | 98.6 | 98.4 | 99.7 | 98.4 | 97.8 | 99.4 | ***  | 98.6 | 99.8 | 98.3 |
|                       | 15     | 97.1                  | 96.5 | 96.3 | 96.3 | 96   | 97   | 97.1 | 98.2 | 98.1 | 99.7 | 98.1 | 97.4 | 99.4 | 99.4 | ***  | 98.6 | 99.4 |
|                       | 16     | 97.4                  | 96.8 | 96.6 | 96.6 | 96.3 | 97.3 | 97.4 | 98.6 | 98.4 | 99.7 | 98.4 | 97.8 | 99.4 | 100  | 99.4 | ***  | 98.3 |
|                       | 17     | 96.6                  | 96   | 96.2 | 96.2 | 95.8 | 97.1 | 97.3 | 97.8 | 97.9 | 99.2 | 97.6 | 97   | 98.9 | 98.9 | 98.9 | 98.9 | ***  |

| Label     | Strain (accession number)                 | Label     | Strain (accession number)                 |
|-----------|-------------------------------------------|-----------|-------------------------------------------|
| <b>1</b>  | A/chicken/PA/7659/1985(H5N2)(KP674445)    | <b>11</b> | A/chukkar/MN/14591-7/1998(H5N2)(AY300926) |
| <b>2</b>  | A/mallard/WI/411/1981(H5N2)(CY179405)     | <b>12</b> | A/pheasant/NJ/1355/1998(H5N2)(AY300927)   |
| <b>3</b>  | A/mallard/WI/1616/1983(H5N2)(CY178112)    | <b>13</b> | A/duck/IL/08OS2688/2008(H5N2)(CY079454)   |
| <b>4</b>  | A/widgeon/WI/493/1983(H5N2)(CY178088)     | <b>14</b> | A/turkey/NY/465977/2006(H5N2)(GQ117163)   |
| <b>5</b>  | A/teal/WI/568/1983(H5N2)(CY178096)        | <b>15</b> | A/duck/OH/470655/2007(H5N2)(GQ923543)     |
| <b>6</b>  | A/goose/WI/711/1975(H5N2)(FJ517332)       | <b>16</b> | A/waterfowl/CO/476466-3/2007(H5N2)(GQ923) |
| <b>7</b>  | A/mallard/AL/847/1975(H5N2)(CY179765)     | <b>17</b> | A/pintail/FL/480645-5/2007(H5N2)(GQ92340) |
| <b>8</b>  | A/environment/NY/5626-1/1998(H5N2)(EU742) |           |                                           |
| <b>9</b>  | A/mallard/MD/790/2002(H5N2)(EU980481)     |           |                                           |
| <b>10</b> | A/duck/MN/462960-2/2006(H5N2)(GQ923175)   |           |                                           |

**table S4. Assembled contigs of the H11N9 AIV field sample enriched by CNT-STEM.**

| Segment      | Contig length (nt) | Ave. seq. depth (min/max) | Closest H5N2 strain in Genbank                                           |              |                     |          |
|--------------|--------------------|---------------------------|--------------------------------------------------------------------------|--------------|---------------------|----------|
|              |                    |                           | Highest similarity strain (sequence ID)                                  | Length (nt)  | Identities          | Gaps     |
| PB2          | 2324               | 13±2<br>(1/25)            | A/blue-winged Teal/North Dakota/AI09-2912/2009(H6N1) (CY140760)          | 2307         | 99%<br>(2303/2307)  | 0/2307   |
| PB1          | 2316               | 12±4<br>(1/22)            | A/blue-winged teal/New Brunswick/00288/2010(H5N2) (CY138318)             | 2316         | 99%<br>(2311/2314)  | 0/2314   |
| PA           | 2210               | 14±6<br>(1/18)            | A/American black duck/New Brunswick/02629/2007(H3N8) (CY129051)          | 2201         | 99%<br>(2201/2205)  | 0/2205   |
| HA           | 1744               | 12±1<br>(2/18)            | A/Anas acuta/New Mexico/A00629381/2008(H11N9) (KF542875)                 | 1740         | 99%<br>(1730/1740)  | 0/1740   |
| NP           | 1592               | 11±1<br>(1/21)            | A/mallard/Minnesota/AI06-962/2006(H4N8) (CY139972)                       | 1541         | 99%<br>(1522/1524)  | 0/1524   |
| NA           | 1435               | 11±2<br>(2/18)            | A/mallard/Iowa/3193/2009(H11N9) (CY097584)                               | 1435         | 99%<br>(1427/1435)  | 0/1435   |
| M1/M2        | 1008               | 11±3<br>(1/28)            | A/green winged teal/Delaware/468157-6/2006(H5N2) (GU050076)              | 1027         | 100%<br>(1007/1007) | 0/1007   |
| NS1/NS2      | 862                | 14±4<br>(1/22)            | A/northern pintail/Illinois/464067-4/2006(H5N9) (GU051984)(gb U85382.1 ) | 865          | 99%<br>(856/858)    | 0/858    |
| <b>Total</b> | <b>13491</b>       |                           |                                                                          | <b>13432</b> |                     | <b>0</b> |

**table S5. Phylogenetic analysis of the emerging H11N9 strain (A/duck/PA/02099/2012) to previously reported and closely related AIV strains.**

**A) HA**

|                       | Strain | % Nucleotide identity |      |      |      |      |      |      |      |      |      |      |      |      |      |
|-----------------------|--------|-----------------------|------|------|------|------|------|------|------|------|------|------|------|------|------|
|                       |        | 1                     | 2    | 3    | 4    | 5    | 6    | 7    | 8    | 9    | 10   | 11   | 12   | 13   | 14   |
| % Amino acid identity | 1      | ***                   | 99.9 | 99.3 | 98.3 | 98.1 | 98.1 | 97.9 | 97.8 | 97.7 | 97.3 | 97.3 | 96.5 | 95.9 | 92.8 |
|                       | 2      | 99.7                  | ***  | 99.2 | 98.1 | 97.9 | 98   | 97.7 | 97.7 | 97.6 | 97.2 | 97.3 | 96.4 | 95.8 | 92.7 |
|                       | 3      | 99.1                  | 98.8 | ***  | 97.6 | 97.4 | 97.5 | 97.2 | 97.4 | 97   | 96.6 | 96.7 | 95.8 | 95.3 | 92.3 |
|                       | 4      | 99.7                  | 99.5 | 98.8 | ***  | 99.4 | 96.9 | 96.6 | 96.6 | 96.4 | 96.6 | 97.5 | 96   | 95.3 | 92   |
|                       | 5      | 99.3                  | 99.1 | 98.4 | 99.3 | ***  | 96.6 | 96.3 | 96.4 | 96.1 | 96.3 | 97.3 | 95.8 | 95.1 | 91.7 |
|                       | 6      | 98.8                  | 98.5 | 97.9 | 98.8 | 98.4 | ***  | 99.1 | 96.3 | 98.9 | 95.9 | 95.8 | 95.1 | 94.3 | 91.5 |
|                       | 7      | 98.5                  | 98.3 | 97.6 | 98.5 | 98.1 | 99.2 | ***  | 96.2 | 99   | 95.6 | 95.5 | 95   | 94.1 | 91.3 |
|                       | 8      | 98.4                  | 98.1 | 98   | 98.3 | 97.7 | 97.7 | 97.5 | ***  | 95.9 | 96.1 | 95.9 | 95.3 | 94.8 | 91.4 |
|                       | 9      | 98.3                  | 98   | 97.3 | 98.3 | 97.9 | 98.9 | 99.2 | 97.2 | ***  | 95.4 | 95.3 | 94.8 | 94   | 91.3 |
|                       | 10     | 98.1                  | 97.9 | 97.2 | 98.1 | 97.7 | 97.7 | 97.5 | 96.8 | 97.2 | ***  | 96.1 | 98.5 | 97   | 93.5 |
|                       | 11     | 98.3                  | 98.3 | 97.3 | 98.3 | 97.9 | 97.3 | 97.1 | 96.7 | 96.8 | 97.7 | ***  | 95.5 | 94.5 | 91.4 |
|                       | 12     | 97.7                  | 97.5 | 96.8 | 97.7 | 97.5 | 97.6 | 97.9 | 96.7 | 97.1 | 98.3 | 97.3 | ***  | 96.6 | 92.8 |
|                       | 13     | 98.7                  | 98.4 | 97.7 | 98.7 | 98.3 | 98   | 97.7 | 97.2 | 97.5 | 98.4 | 97.7 | 98   | ***  | 93.5 |
|                       | 14     | 97.1                  | 96.8 | 96.7 | 97.1 | 96.7 | 96.4 | 96.2 | 95.9 | 95.9 | 97.3 | 96.8 | 96.7 | 97.3 | ***  |

| Label     | Strain (accession number)                       | Label     | Strain (accession number)                   |
|-----------|-------------------------------------------------|-----------|---------------------------------------------|
| <b>1</b>  | A/duck/PA/2099/2012(H11N9)(KR870237)            | <b>11</b> | A/mallard/MS/11OS5863/2011(H11N9)(CY166760) |
| <b>2</b>  | A/mallard/MN/Sg-00118/2007(H11N9)(CY078050)     | <b>12</b> | A/mallard/MN/346246/2000(H11N9)(DQ424860)   |
| <b>3</b>  | A/Anas_acuta/NM/A00629381/2008(H11N9)(KF542875) | <b>13</b> | A/mallard/MD/538/2002(H11N9)(GQ257487)      |
| <b>4</b>  | A/mallard/CA/6634/2008(H11N9)(CY094125)         | <b>14</b> | A/mallard/WI/456/1984(H11N9)(CY021661)      |
| <b>5</b>  | A/mallard/CA/10125/2008(H11N9)(CY093671)        |           |                                             |
| <b>6</b>  | A/shoveler/IL/10OS3619/2010(H11N9)(CY133029)    |           |                                             |
| <b>7</b>  | A/mallard/WI/10OS4193/2010(H11N9)(CY133045)     |           |                                             |
| <b>8</b>  | A/mallard/AK/44430-056/2008(H11N9)(HM193587)    |           |                                             |
| <b>9</b>  | A/mallard/OH/12OS4697/2012(H11N9)(CY186822)     |           |                                             |
| <b>10</b> | A/mallard/MN/182722/1998(H11N9)(CY139745)       |           |                                             |

B) NA

|                       | % Nucleotide identity |      |      |      |      |      |      |      |      |      |      |      |      |      |      |      |      |      |      |      |
|-----------------------|-----------------------|------|------|------|------|------|------|------|------|------|------|------|------|------|------|------|------|------|------|------|
|                       | Strain                | 1    | 2    | 3    | 4    | 5    | 6    | 7    | 8    | 9    | 10   | 11   | 12   | 13   | 14   | 15   | 16   | 17   | 18   |      |
| % Amino acid identity | 1                     | ***  | 99.8 | 99.5 | 99.5 | 99.4 | 99.4 | 99.3 | 99.2 | 98.7 | 98.7 | 98.4 | 98.3 | 98.3 | 98   | 97.7 | 97.5 | 97.4 | 97.2 |      |
|                       | 2                     | 99.3 | ***  | 99.6 | 99.6 | 99.5 | 99.5 | 99.4 | 99.3 | 98.5 | 98.4 | 98.1 | 98.1 | 98.1 | 97.7 | 97.4 | 97.3 | 97.2 | 97   |      |
|                       | 3                     | 98.4 | 98.7 | ***  | 100  | 99.3 | 99.7 | 99.6 | 99.5 | 98.2 | 98.1 | 97.8 | 97.8 | 97.8 | 97.4 | 97.1 | 97   | 96.9 | 96.9 |      |
|                       | 4                     | 98.4 | 98.7 | 100  | ***  | 99.3 | 99.7 | 99.6 | 99.5 | 98.2 | 98.1 | 97.8 | 97.8 | 97.8 | 97.4 | 97.1 | 97   | 96.9 | 96.9 |      |
|                       | 5                     | 98.6 | 98.9 | 98.9 | 98.9 | ***  | 99.3 | 99.2 | 99.1 | 98.1 | 98.1 | 97.8 | 97.7 | 97.7 | 97.4 | 97.2 | 96.9 | 96.8 | 96.7 |      |
|                       | 6                     | 98.2 | 98.6 | 99.1 | 99.1 | 98.7 | ***  | 99.5 | 99.7 | 98.1 | 98.1 | 97.8 | 97.7 | 97.7 | 97.4 | 97.1 | 96.9 | 96.8 | 96.6 |      |
|                       | 7                     | 98.2 | 98.6 | 99.1 | 99.1 | 98.7 | 98.9 | ***  | 99.3 | 98   | 98   | 97.7 | 97.7 | 97.6 | 97.4 | 97.1 | 96.9 | 96.8 | 96.6 |      |
|                       | 8                     | 97.8 | 98.2 | 98.7 | 98.7 | 98.4 | 99.3 | 98.6 | ***  | 98   | 97.9 | 97.6 | 97.5 | 97.5 | 97.2 | 96.9 | 96.8 | 96.6 | 96.5 |      |
|                       | 9                     | 96.6 | 95.8 | 94.9 | 94.9 | 95.1 | 94.8 | 94.8 | 94.4 | ***  | 97.4 | 97.1 | 97.1 | 97.1 | 99.1 | 98.7 | 98.4 | 98.3 | 98.4 |      |
|                       | 10                    | 97.3 | 96.6 | 95.7 | 95.7 | 95.8 | 95.5 | 95.5 | 95.1 | 93.9 | ***  | 99.6 | 99.5 | 99.5 | 97   | 96.7 | 96.4 | 96.3 | 96.3 |      |
|                       | 11                    | 96.2 | 95.5 | 94.6 | 94.6 | 94.8 | 94.4 | 94.4 | 94   | 92.8 | 98.9 | ***  | 99.9 | 99.6 | 96.7 | 96.4 | 96.1 | 96   | 96.1 |      |
|                       | 12                    | 96   | 95.3 | 94.4 | 94.4 | 94.6 | 94.2 | 94.4 | 93.9 | 92.6 | 98.7 | 99.8 | ***  | 99.5 | 96.7 | 96.4 | 96.1 | 96   | 96.1 |      |
|                       | 13                    | 96.2 | 95.5 | 94.6 | 94.6 | 94.8 | 94.4 | 94.4 | 94   | 92.8 | 98.9 | 98.9 | 98.7 | ***  | 96.6 | 96.3 | 96   | 95.9 | 96   |      |
|                       | 14                    | 94.2 | 93.5 | 92.6 | 92.6 | 92.8 | 92.4 | 92.8 | 92.1 | 97.3 | 92.6 | 91.5 | 91.5 | 91.5 | 95.8 | ***  | 98.5 | 98.1 | 98   | 98.7 |
|                       | 15                    | 93.7 | 93   | 92.4 | 92.4 | 92.6 | 92.2 | 92.6 | 91.9 | 96.4 | 92.1 | 91   | 91   | 91   | 95.8 | ***  | 98.1 | 98   | 97.8 |      |
|                       | 16                    | 93.7 | 93   | 92.1 | 92.1 | 92.2 | 91.9 | 92.2 | 91.5 | 96   | 91.3 | 90.3 | 90.3 | 90.3 | 95.3 | 95.3 | ***  | 99.3 | 97.4 |      |
|                       | 17                    | 93.5 | 92.8 | 91.9 | 91.9 | 92.1 | 91.7 | 92.1 | 91.3 | 95.8 | 91.2 | 90.1 | 90.1 | 90.1 | 94.9 | 95.1 | 98   | ***  | 97.3 |      |
|                       | 18                    | 92.4 | 91.7 | 91.5 | 91.5 | 91.2 | 90.6 | 90.8 | 90.3 | 95.5 | 90.8 | 90.1 | 90.1 | 90.1 | 96.2 | 93.9 | 93.1 | 93.3 | ***  |      |

| Label | Strain (accession number)                     | Label | Strain (accession number)                             |
|-------|-----------------------------------------------|-------|-------------------------------------------------------|
| 1     | A/duck/PA/2099/2012(H11N9)(KR870239)          | 11    | A/shorebird/DE/351/2009(H1N9)(CY137916)               |
| 2     | A/mallard/MN/Sg-00118/2007(H11N9)(CY078052)   | 12    | A/turnstone/NJ/AI09-1082/2009(H1N9)(CY146281)         |
| 3     | A/goldeneye/IW/3192/2009(H11N9)(CY097068)     | 13    | A/turnstone/Ilha_de_Canelas/A51/2008(H11N9)(KF824506) |
| 4     | A/mallard/IA/3193/2009(H11N9)(CY097584)       | 14    | A/teal/OH/467/2001(H11N9)(GU053360)                   |
| 5     | A/mallard/OH/2033/2009(H4N9)(CY097119)        | 15    | A/knot/DE/650666/2002(H11N9)(CY144334)                |
| 6     | A/mallard/WI/4203/2009(H11N9)(CY097424)       | 16    | A/pintail/AB/22/1997(H2N9)(CY116777)                  |
| 7     | A/mallard/AR/AI09-5663/2009(H11N9)(CY141011)  | 17    | A/duck/WA/663/1997(H11N9)(EF599119)                   |
| 8     | A/teal/OH/12OS2138/2012(H10N9)(CY186865)      | 18    | A/mallard/MD/439/2002(H11N9)(GQ257481)                |
| 9     | A/mallard/AB/31/2001(H3N9)(CY004701)          |       |                                                       |
| 10    | A/turnstone/NJ/Sg-00561/2008(H11N9)(CY145689) |       |                                                       |

**table S6. Comparison of contigs of the unknown virus (IBDV/Turkey/PA/00924/14) generated by de novo assembly after CNT-STEM enrichment and NGS to the closest IBDV strains in Genbank.**

| Segment      | Contig length (nt) | Average sequencing depth (min/max) | Comparison to the closest IBDV strains in Genbank    |             |                 |           |        |
|--------------|--------------------|------------------------------------|------------------------------------------------------|-------------|-----------------|-----------|--------|
|              |                    |                                    | Highest similarity strain (sequence ID)              | Length (nt) | Identities      | Gaps      | Host   |
| A            | 3258               | 806±255(219/1028)                  | Infectious bursal disease virus segment A (U30818)   | 3254        | 94% (3070/3259) | 12/3259   | Gallus |
| B            | 2857               | 1307±450 (377/2623)                | Infectious bursal disease virus segment B (AY918949) | 2827        | 95% (2698/2827) | 0/2807    | Edgar  |
| <b>Total</b> | <b>6044</b>        |                                    |                                                      | <b>6013</b> |                 | <b>11</b> |        |

**table S7. Single-nucleotide polymorphism/variant analysis of the “unknown” virus (IBDV/turkey/PA/00924/14) to sequenced IDBV virus strains.**

**A) VP2, VP3, VP4**

|                       | Strain | % Nucleotide identity |      |      |      |      |      |      |      |      |      |      |      |      |      |      |      |      |      |
|-----------------------|--------|-----------------------|------|------|------|------|------|------|------|------|------|------|------|------|------|------|------|------|------|
|                       |        | 1                     | 2    | 3    | 4    | 5    | 6    | 7    | 8    | 9    | 10   | 11   | 12   | 13   | 14   | 15   | 16   | 17   |      |
| % Amino acid identity | 1      | ***                   | 93.9 | 91.3 | 84   | 84   | 83.9 | 83.8 | 83.8 | 83.8 | 83.8 | 83.7 | 83.7 | 83.7 | 83.7 | 83.6 | 83.5 | 83.4 |      |
|                       | 2      | 97                    | ***  | 91   | 83.7 | 83.8 | 83.7 | 83.7 | 83.6 | 83.5 | 83.6 | 83.5 | 83.5 | 83.5 | 83.5 | 83.5 | 83.5 | 83.3 | 83.3 |
|                       | 3      | 97.3                  | 96.7 | ***  | 83.5 | 83.6 | 83.3 | 83.5 | 83.5 | 83.5 | 83.5 | 83.4 | 83.3 | 83.3 | 83.4 | 83.3 | 83.2 | 83.2 | 83.2 |
|                       | 4      | 91.4                  | 90.3 | 91.6 | ***  | 99.8 | 99.7 | 98.1 | 98.1 | 98.1 | 98.1 | 98.1 | 98   | 99.1 | 98   | 98   | 97.7 | 97.7 | 97.7 |
|                       | 5      | 91.4                  | 90.3 | 91.6 | 100  | ***  | 99.5 | 98.3 | 98.2 | 98.3 | 98.2 | 98.2 | 98.2 | 99.1 | 98.1 | 98.2 | 97.9 | 97.8 | 97.8 |
|                       | 6      | 91                    | 90.2 | 91.3 | 99.6 | 99.6 | ***  | 97.8 | 97.8 | 97.8 | 97.8 | 97.8 | 97.8 | 98.9 | 97.7 | 97.8 | 97.5 | 97.4 | 97.4 |
|                       | 7      | 91.3                  | 90.4 | 91.5 | 98.8 | 98.8 | 98.4 | ***  | 99.8 | 99.7 | 99.9 | 99.7 | 99.7 | 98.2 | 99.7 | 99.7 | 99.5 | 99.4 | 99.4 |
|                       | 8      | 91.2                  | 90.3 | 91.4 | 98.8 | 98.8 | 98.4 | 99.8 | ***  | 99.7 | 99.8 | 99.7 | 99.7 | 98.2 | 99.8 | 99.7 | 99.6 | 99.5 | 99.5 |
|                       | 9      | 91.2                  | 90.1 | 91.4 | 98.8 | 98.8 | 98.4 | 99.4 | 99.4 | ***  | 99.7 | 99.8 | 99.9 | 98.1 | 99.6 | 99.9 | 99.4 | 99.3 | 99.3 |
|                       | 10     | 91.1                  | 90.2 | 91.3 | 98.6 | 98.6 | 98.2 | 99.8 | 99.6 | 99.2 | ***  | 99.7 | 99.8 | 98.2 | 99.7 | 99.8 | 99.4 | 99.4 | 99.4 |
|                       | 11     | 91.1                  | 90   | 91.3 | 98.9 | 98.9 | 98.5 | 99.5 | 99.5 | 99.7 | 99.3 | ***  | 99.8 | 98.1 | 99.6 | 99.8 | 99.3 | 99.3 | 99.3 |
|                       | 12     | 90.9                  | 90   | 91.1 | 98.7 | 98.7 | 98.3 | 99.5 | 99.5 | 99.7 | 99.5 | 99.6 | ***  | 98.1 | 99.6 | 99.9 | 99.3 | 99.3 | 99.3 |
|                       | 13     | 91.1                  | 90   | 91.4 | 99.2 | 99.2 | 98.8 | 99   | 99   | 98.8 | 98.8 | 98.9 | 98.7 | ***  | 98.1 | 98.1 | 97.8 | 97.8 | 97.8 |
|                       | 14     | 90.9                  | 90   | 91.1 | 98.5 | 98.5 | 98.1 | 99.5 | 99.7 | 99.1 | 99.3 | 99.2 | 99.2 | 98.7 | ***  | 99.6 | 99.8 | 99.7 | 99.7 |
|                       | 15     | 90.9                  | 90   | 91.1 | 98.7 | 98.7 | 98.3 | 99.5 | 99.5 | 99.7 | 99.5 | 99.6 | 100  | 98.7 | 99.2 | ***  | 99.3 | 99.3 | 99.3 |
|                       | 16     | 90.4                  | 89.5 | 90.6 | 98   | 98   | 97.6 | 99   | 99.2 | 98.6 | 98.8 | 98.7 | 98.7 | 98.2 | 99.5 | 98.7 | ***  | 99.5 | 99.5 |
|                       | 17     | 90.4                  | 89.5 | 90.6 | 97.9 | 97.9 | 97.5 | 98.9 | 99.1 | 98.5 | 98.7 | 98.6 | 98.6 | 98.1 | 99.4 | 98.6 | 98.9 | ***  | ***  |

| Label     | Strain (accession number) | Label     | Strain (accession number) |
|-----------|---------------------------|-----------|---------------------------|
| <b>1</b>  | 00924(2014)(KP642112)     | <b>11</b> | CS-2-35(2008)(EF418033)   |
| <b>2</b>  | OH(2007)(U30818)          | <b>12</b> | CT(2001)(AJ310185)        |
| <b>3</b>  | 23/82(2001)(AF362773)     | <b>13</b> | IM(2004)(AY029166)        |
| <b>4</b>  | A-BH83(2011)(JF811920)    | <b>14</b> | JD1(2002)(AF321055)       |
| <b>5</b>  | HPR-2(2008)(EF418036)     | <b>15</b> | Gt(2007)(DQ403248)        |
| <b>6</b>  | STC(2007)(D00499)         | <b>16</b> | HZ2(2002)(AF321054)       |
| <b>7</b>  | 903/78(2012)(JQ411012)    | <b>17</b> | ZJ2000(2002)(AF321056)    |
| <b>8</b>  | D78(2004)(AF499929)       |           |                           |
| <b>9</b>  | H-30(2008)(EF418035)      |           |                           |
| <b>10</b> | P2(2003)(X84034)          |           |                           |

**B) VP1**

|                       | Strain | % Nucleotide identity |      |      |      |      |      |      |      |      |      |      |      |      |      |      |      |
|-----------------------|--------|-----------------------|------|------|------|------|------|------|------|------|------|------|------|------|------|------|------|
|                       |        | 1                     | 2    | 3    | 4    | 5    | 6    | 7    | 8    | 9    | 10   | 11   | 12   | 13   | 14   | 15   | 16   |
| % Amino acid identity | 1      | ***                   | 95.4 | 95.3 | 95.2 | 95   | 95   | 94.9 | 94.7 | 93.4 | 93.1 | 91.3 | 90.5 | 90.5 | 90.2 | 90.1 | 89.5 |
|                       | 2      | 95.4                  | ***  | 99.6 | 95.7 | 98.3 | 98.2 | 98.6 | 95.1 | 95.9 | 95.8 | 92.4 | 90.2 | 90.3 | 90.1 | 89.6 | 89.6 |
|                       | 3      | 95.3                  | 99.6 | ***  | 95.6 | 98.1 | 98.1 | 98.5 | 95   | 95.8 | 95.8 | 92.2 | 90.1 | 90.3 | 90.1 | 89.6 | 89.5 |
|                       | 4      | 95.2                  | 95.7 | 95.6 | ***  | 95.3 | 95.3 | 95.4 | 95.3 | 93.7 | 93.8 | 91.5 | 90.9 | 90.8 | 90.6 | 90.1 | 90   |
|                       | 5      | 95                    | 98.3 | 98.1 | 95.3 | ***  | 100  | 98.3 | 94.7 | 95.4 | 95.7 | 92.9 | 90.1 | 90   | 89.7 | 89.4 | 89.2 |
|                       | 6      | 95                    | 98.2 | 98.1 | 95.3 | 100  | ***  | 98.3 | 94.6 | 95.4 | 95.6 | 92.9 | 90.1 | 89.9 | 89.7 | 89.3 | 89.2 |
|                       | 7      | 94.9                  | 98.6 | 98.5 | 95.4 | 98.3 | 98.3 | ***  | 94.8 | 95.8 | 96.7 | 92.5 | 90.3 | 90.2 | 89.9 | 89.6 | 89.6 |
|                       | 8      | 94.7                  | 95.1 | 95   | 95.3 | 94.7 | 94.6 | 94.8 | ***  | 93.1 | 92.8 | 90.7 | 90.3 | 91.1 | 90.9 | 90.5 | 89.5 |
|                       | 9      | 93.4                  | 95.9 | 95.8 | 93.7 | 95.4 | 95.4 | 95.8 | 93.1 | ***  | 93.6 | 90.9 | 89.6 | 89.5 | 89.4 | 88.7 | 88.6 |
|                       | 10     | 93.1                  | 95.8 | 95.8 | 93.8 | 95.7 | 95.6 | 96.7 | 92.8 | 93.6 | ***  | 90.5 | 89.7 | 89.4 | 89.4 | 88.7 | 89.1 |
|                       | 11     | 91.3                  | 92.4 | 92.2 | 91.5 | 92.9 | 92.9 | 92.5 | 90.7 | 90.9 | 90.5 | ***  | 89.5 | 88.3 | 88.1 | 88   | 88.1 |
|                       | 12     | 90.5                  | 90.2 | 90.1 | 90.9 | 90.1 | 90.1 | 90.3 | 90.3 | 89.6 | 89.7 | 89.5 | ***  | 93.1 | 93   | 92.5 | 92.6 |
|                       | 13     | 90.5                  | 90.3 | 90.3 | 90.8 | 90   | 89.9 | 90.2 | 91.1 | 89.5 | 89.4 | 88.3 | 93.1 | ***  | 99.3 | 97.2 | 91.7 |
|                       | 14     | 90.2                  | 90.1 | 90.1 | 90.6 | 89.7 | 89.7 | 89.9 | 90.9 | 89.4 | 89.4 | 88.1 | 93   | 99.3 | ***  | 96.9 | 91.5 |
|                       | 15     | 90.1                  | 89.6 | 89.6 | 90.1 | 89.4 | 89.3 | 89.6 | 90.5 | 88.7 | 88.7 | 88   | 92.5 | 97.2 | 96.9 | ***  | 91.2 |
|                       | 16     | 89.5                  | 89.6 | 89.5 | 90   | 89.2 | 89.2 | 89.6 | 89.5 | 88.6 | 89.1 | 88.1 | 92.6 | 91.7 | 91.5 | 91.2 | ***  |

| Label     | Strain (accession number) | Label     | Strain (accession number) |
|-----------|---------------------------|-----------|---------------------------|
| <b>1</b>  | 00924(2012)(KP642112)     | <b>11</b> | HN04(2013)(KC109815)      |
| <b>2</b>  | Edgar(2007)(AY918949)     | <b>12</b> | HLJ-7(GQ452269)           |
| <b>3</b>  | Lukert(2007)(AY918947)    | <b>13</b> | SK53(2014)(KJ198845)      |
| <b>4</b>  | 23/82(2001)(AF362774)     | <b>14</b> | HLJ-4(2010)(GQ449689)     |
| <b>5</b>  | GA-1(2008)(EU162094)      | <b>15</b> | ZZ-11(2012)(JX682712)     |
| <b>6</b>  | ViBursa(2008)(EU162092)   | <b>16</b> | QL(2012)(JX682710)        |
| <b>7</b>  | A-BH83(2011)(JF811921)    |           |                           |
| <b>8</b>  | OH(2007)(U30819)          |           |                           |
| <b>9</b>  | MG1(2013)(JN982246)       |           |                           |
| <b>10</b> | GX-NNZ-11(2012)(JX134484) |           |                           |



**table S8. Comparison of CNT-STEM to several reported ultrafiltration devices.**

| Ultrafiltration Devices                      | Pore size (nm) | Thickness     | Operating pressure (kPa) | Flux (m/s) <sup>a</sup>    | Normalized resistance (/m) <sup>b</sup> | Permeability (m <sup>2</sup> ) <sup>c</sup> | Porosity   | Tunable range (nm) | Reference         |
|----------------------------------------------|----------------|---------------|--------------------------|----------------------------|-----------------------------------------|---------------------------------------------|------------|--------------------|-------------------|
| Hydrophilized PVDF (Millipore Viresolve 180) | 12-18          | 150 μm        | 103                      | 1.4-1.5×10 <sup>-4</sup>   | 6.9-7.4×10 <sup>11</sup>                | 2.1×10 <sup>-16</sup>                       | -          | -                  | (76, 77)          |
| Hydrophilized PVDF (Pall DV20)               | 20             | 40 μm         | 155                      | 2.1×10 <sup>-7</sup>       | 7.5×10 <sup>14</sup>                    | 5.4×10 <sup>-20</sup>                       | -          | 20, 50             | (76)              |
| Nanoporous block co-polymer                  | 15             | 80 nm         | 10                       | 1.1-1.4×10 <sup>-5</sup>   | 7.2-9.0×10 <sup>11</sup>                | 1.0×10 <sup>-19</sup>                       | 20%        | 10-40              | (78)              |
| Anodized aluminum oxide membrane             | 16             | -             | 98                       | 1.3×10 <sup>-6</sup>       | 7.5×10 <sup>13</sup>                    | -                                           | -          | 15-401             | (79-83)           |
|                                              | 20             | 60 μm         | 150                      | 4.4×10 <sup>-4</sup>       | 3.4×10 <sup>11</sup>                    | 1.8×10 <sup>-16</sup>                       | 25-50%     |                    |                   |
| Track etched polycarbonate (Nuclepore)       | 15             | 6.5 μm        | 10                       | 0.8-1.1×10 <sup>-7</sup>   | 0.9-1.2×10 <sup>14</sup>                | 6.1×10 <sup>-20</sup>                       | 2%         | 15-8,000           | (78)              |
|                                              |                |               | 196                      | 1.8×10 <sup>-6</sup>       |                                         |                                             |            |                    | (83)              |
| <b>CNT-STEM</b>                              | <b>25</b>      | <b>100 μm</b> | <b>0.69</b>              | <b>1.2×10<sup>-4</sup></b> | <b>5.9×10<sup>9</sup></b>               | <b>1.7×10<sup>-14</sup></b>                 | <b>78%</b> | <b>17-325</b>      | <b>This study</b> |
|                                              | <b>95</b>      |               |                          | <b>7.7×10<sup>-4</sup></b> | <b>9.0×10<sup>8</sup></b>               | <b>1.1×10<sup>-13</sup></b>                 | <b>92%</b> |                    |                   |

a: Flux (m/s)  $J_v$  is either taken directly from references or calculated by using volumetric flow rate  $Q$  and cross-sectional area  $A$  as  $J_v = \frac{Q}{A}$

b: Normalized resistance  $R_m$  is calculated from flux  $J_v$ , viscosity  $\mu$ , and operation pressure  $\Delta P$  using  $R_m = \frac{-\Delta P}{mJ_v}$  (84)

c: Permeability  $\kappa$  can be calculated from normalized resistance  $R_m$  and membrane thickness using  $\kappa = \frac{L}{R_m}$

**table S9. Yield and reliability analysis of CNT-STEM fabrication, assembly, and testing.**

|             | Steps                  | Yield           | Failure mode             | Counts (failure) |
|-------------|------------------------|-----------------|--------------------------|------------------|
| Fabrication | Iron patterning/dicing | 100% (228/228)  |                          | 0                |
|             | N-MWCNT synthesis      | 100% (228/228)  |                          | 0                |
|             | PDMS bonding           | 93% (212/228)   | Misalignment             | 16               |
|             | Assembly               | 97.2% (206/212) | CNT crash by mishandling | 6                |
| Testing     | Device quality check   | 85.1% (175/206) | Leakage                  | 31               |
|             | Virus filtration       | 100% (175/175)  |                          | 0                |
|             | RNA extraction         | 100% (175/175)  |                          | 0                |
| Total       |                        | 76.8% (175/228) |                          | 53               |

**note S1. Structure stiffness of N-MWCNT forest in the CNT-STEM.**

The structure stiffness of the N-MWCNT forest is important for the construction and successful operation of the CNT-STEM. The N-MWCNT forest is higher than the chamber depth of the PDMS chamber. The sealing between the N-MWCNT forest and the PDMS chamber is through the compressive force of the N-MWCNT forest without any adhesive in between. CNT has the largest elastic (Young's) modulus among all the materials. We studied the effect of N-MWCNT diameter on the aggregated structure stiffness of the N-MWCNT structure.

When force is applied to a single vertical N-MWCNT, we consider the N-MWCNT is a straight hollow cylinder and the force is resolved into two components:  $F_s$  is the shear force perpendicular to the N-MWCNT axial direction, and  $F_n$  is the normal force along the axial direction of the N-MWCNT (fig. S13A). We considered the effects of shear force and normal force separately.

A small deflection  $d$  of a hollow cylinder caused by an applied shear load can be described as following (85)

$$d = \frac{F_s L^3}{3EI} \quad (\text{Equation S1})$$

$$I = \frac{\rho}{4} (R_o^4 - R_i^4) \quad (\text{Equation S2})$$

where  $L$  is the length of the cylinder,  $E$  is the elastic modulus of the cylinder material,  $I$  is the moment of inertia of the cylinder,  $R_o$  and  $R_i$  are the outer and inner radii of the cylinder (fig. S13B).

We applied this equation to the structural stability of CNT-STEM by considering the shear stress  $\tau$  that the N-MWCNT forest can withstand, which is determined by the shear force to a single N-MWCNT  $F_s$  and its linear density ( $\lambda$ , N-MWCNT counts per unit length) of the N-MWCNT forest

$$t = F_s / \lambda^2 \quad (\text{Equation S3})$$

From Equations S1-S3, the shear modulus  $G$ , can be defined as

$$G = \frac{t}{d/L} = \frac{3\rho E(R_o^4 - R_i^4)}{4L^2} \quad (\text{Equation S4})$$

We measured the N-MWCNT linear density  $\lambda$  and the inner diameter  $R_i$ . Both can be fitted into expressions using the N-MWCNT outer diameter  $R_o$  in polynomial forms (fig. S13C&D)

$$\lambda = 2.2 \times 10^3 + 8.9 \times 10^5 R_o^{-1} + 2.3 \times 10^7 R_o^{-2} \quad (\text{counts/cm}), R^2 = 0.993 \quad (\text{Equation S5})$$

$$R_i = 0.50R_o - 0.20 \quad (\text{nm}), R^2 = 0.989 \quad (\text{Equation S6})$$

Assuming  $E = 500 \text{ GPa}$  (38),  $L = 40 \mu\text{m}$ , the shear modulus of the N-MWCNT structure is a function of N-MWCNT outer diameter

$$G = 3.3 \times 10^{-5} R_o^4 + 2.7 \times 10^{-2} R_o^3 + 6.2 R_o^2 + 2.9 \times 10^2 R_o + 3.7 \times 10^3 + 3.8 \times 10^2 R_o^{-1} - 2.3 \times 10^2 R_o^{-2} + 62 R_o^{-3} - 6.2 R_o^{-4} \quad (\text{Pa}, R_o \text{ in nm}) \quad (\text{Equation S7})$$

We plotted this equation based on measured N-MWCNT diameter data and the fitting equation (fig. S13E). It is clear that large outer diameter improves the overall structure stiffness. For the CNT-STEM, it means the N-MWCNT forest can withstand larger shear stress if N-MWCNTs of larger diameter are used.

Based on the fundamental mode of buckling to a column fixed on both ends, the critical axial buckling force  $F_n$  exceeding which the structure is under unstable equilibrium can be calculated as (85)

$$F_n = \frac{4\rho^2 EI}{L^2} \quad (\text{Equation S8})$$

Thus the critical buckling stress (force per area)  $\sigma$  is

$$S = F_n D^2 = \frac{4\rho^2 E I D^2}{L^2} = \frac{\rho^3 E (R_o^4 - R_i^4) D^2}{L^2} \quad (\text{Equation S9})$$

$\sigma$  can be expressed as a function of the N-MWCNT outer diameter  $R_o$

$$S = 4.5 \times 10^{-4} R_o^4 + 0.36 R_o^3 + 82 R_o^2 + 3.8 \times 10^3 R_o + 4.9 \times 10^4 + 5.0 \times 10^3 R_o^{-1} - 3.1 \times 10^3 R_o^{-2} + 8.3 \times 10^2 R_o^{-3} - 83 R_o^{-4} \quad (\text{Pa}, R_o \text{ in nm}) \quad (\text{Equation S10})$$

We plotted this equation based on measurement data and the fitting equation (fig. S13F). Similarly to the case of the shear modulus, the larger the N-MWCNT diameter ( $R_o$ ) has larger critical buckling stress ( $\sigma$ ). This result suggests a N-MWCNT forest with a larger average diameter can withstand larger loading force to prevent buckling associated instability.

**note S2. Device reliability study.**

In table S9, we recorded and analyzed the device yield and reliability during the CNT-STEM fabrication, assembly and testing. The overall success rate from device fabrication to testing is 76.8% out of 228 fabricated devices. During device fabrication, the PDMS top chamber was aligned to the N-MWCNT forest patterns by naked eyes before bonding, 16 out of 228 devices (7.0%) failed because of the misalignment. Although the N-MWCNT forest structure can withstand pressure and forces during normal device operation, when it hits a hard surface during fabrication, it can still “crash”. This kind of mishandling accounts for 2.6% of overall device failure. Finally prior to virus filtration, we measured the flow rate during the PBS wash. We found 31 out of 206 devices has a leakage problem, which presented 58.5% (31/53) of all failure devices. We think the leakage was caused by some micro-scale damages of N-MWCNT structures, which compromised the integrity of the N-MWCNT porous wall and too miniscule to be observed under an optical microscope directly. To improve the yield of the device, some custom-made jigs or tools can be designed for automatic handling during the device fabrication, assembly and testing.
